# Supplementary material
Source: MDPI journal article supplement (https://www.mdpi.com/2304-6740/11/8/336)
Supplement: s1 [file s1 › inorganics-2539990-supplementary.pdf]

## **Supplementary Materials**

# **Sn(IV)porphyrin-anchored TiO<sub>2</sub> Nanoparticles via Axial-Ligand Coordination for Enhancement of Visible Light-activated Photocatalytic Degradation**

Nirmal Kumar Shee and Hee-Joon Kim\*

*Department of Chemistry and Bioscience, Kumoh National Institute of Technology  
61 Daehak-ro, Gumi 39177, Republic of Korea*

## List of contents

**Figure S1.** Energy dispersive X-ray spectroscopy (EDS) elemental maps (C, N, O, Ti, and Sn) of SnP/AA@TiO<sub>2</sub>.

**Figure S2.** TGA curves of TiO<sub>2</sub>, SnP@TiO<sub>2</sub>, and SnP/AA@TiO<sub>2</sub>.

**Figure S3.** N<sub>2</sub> adsorption-desorption isotherms of SnP@TiO<sub>2</sub> and SnP/AA@TiO<sub>2</sub>.

**Figure S4.** RhB adsorption ability of SnP, TiO<sub>2</sub>, SnP@TiO<sub>2</sub>, and SnP/AA@TiO<sub>2</sub>.

**Figure S5.** Photocatalytic degradation of RhB dye in aqueous solution by SnP/AA@TiO<sub>2</sub> under visible-light irradiation.

**Figure S6.** Kinetics for the photocatalytic degradation of RhB dye by SnP, TiO<sub>2</sub>, SnP@TiO<sub>2</sub>, and SnP/AA@TiO<sub>2</sub> photocatalysts under visible-light irradiation.

**Figure S7.** Comparison of RhB dye degradation in presence of SnP, TiO<sub>2</sub>, and SnP/AA@TiO<sub>2</sub> with various wt% of SnP with respect to TiO<sub>2</sub>.

**Figure S8.** Recyclability of SnP/AA@TiO<sub>2</sub> composite photocatalyst in RhB degradation.

**Figure S9.** XRD of SnP/AA@TiO<sub>2</sub> composite photocatalyst before and after RhB degradation.

**Figure S10.** FE-SEM images of SnP/AA@TiO<sub>2</sub> composite photocatalyst before and after RhB degradation.

**Figure S11.** Effect of temperature on RhB degradation in the presence of SnP/AA@TiO<sub>2</sub> composite photocatalyst.

**Figure S12.** Effect of pH of the solution on RhB degradation in the presence of SnP/AA@TiO<sub>2</sub> composite photocatalyst.

**Figure S13.** Effect of initial concentration of RhB on dye degradation using 50 mg of SnP/AA@TiO<sub>2</sub> composite photocatalyst.

**Figure S14.** Photocatalytic degradation of RhB dye in aqueous solution by SnP/AA@TiO<sub>2</sub> composite photocatalyst with the addition of different scavengers under visible-light irradiation ([Na<sub>2</sub>-EDTA]<sub>0</sub> = [*p*-BQ]<sub>0</sub> = [<sup>t</sup>BuOH]<sub>0</sub> = 5 mM, pH 7.0, *T* = 298 K).

**Figure S15.** Photocatalytic activity of SnP/AA@TiO<sub>2</sub> at different wavelengths for the degradation of RhB dye.

**Figure S16.** ESI-MS spectrum (positive ion mode) of the reaction mixture of RhB dye with the SnP/AA@TiO<sub>2</sub> composite photocatalyst after 40 min of visible-light irradiation.

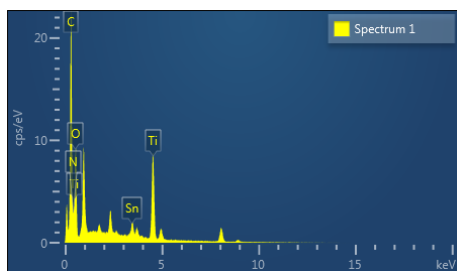

| Element | Weight % | Atomic % |
|---------|----------|----------|
| C       | 41.01    | 57.30    |
| N       | 1.26     | 1.52     |
| O       | 30.53    | 32.10    |
| Ti      | 24.89    | 8.74     |
| Sn      | 2.31     | 0.34     |
| Total:  | 100.00   | 100.00   |

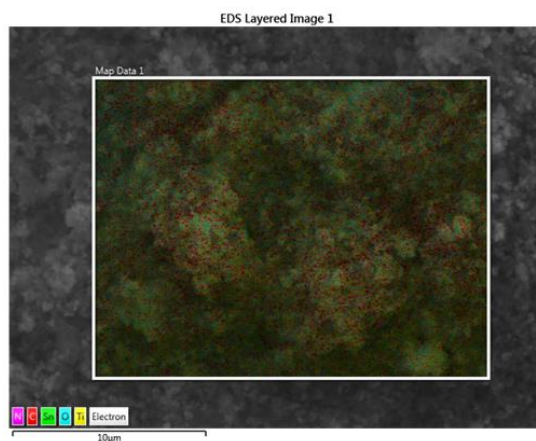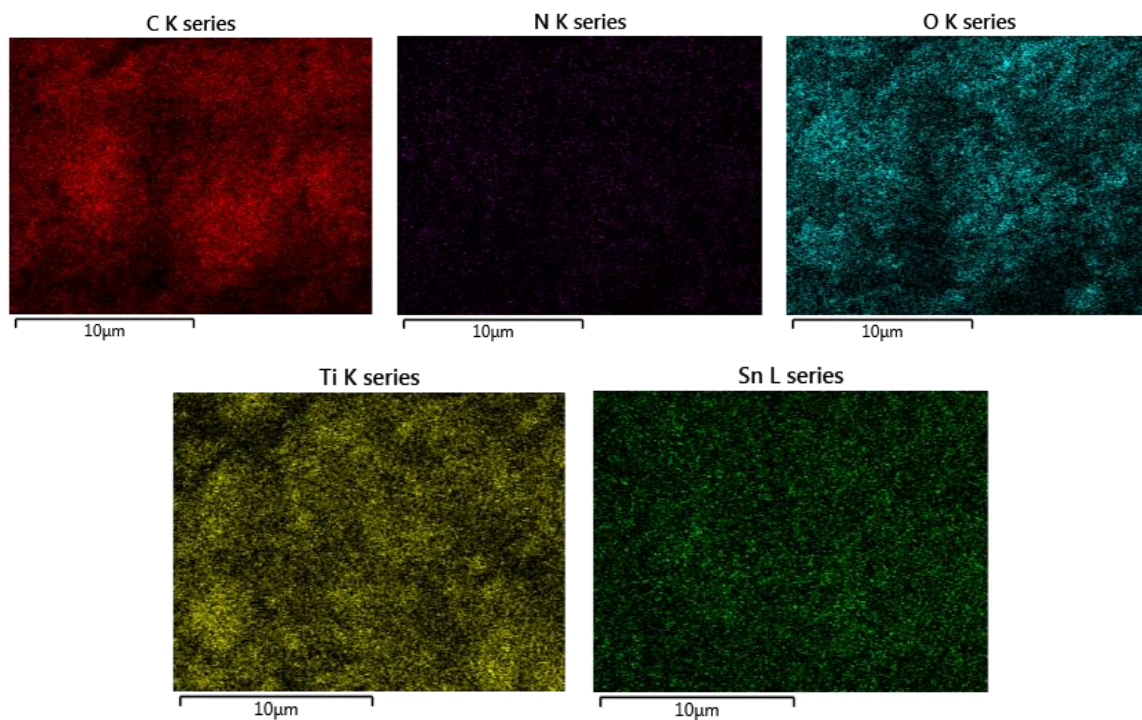

**Figure S1.** Energy dispersive X-ray spectroscopy (EDS) elemental maps (C, N, O, Ti, and Sn) of SnP/AA@TiO<sub>2</sub>.

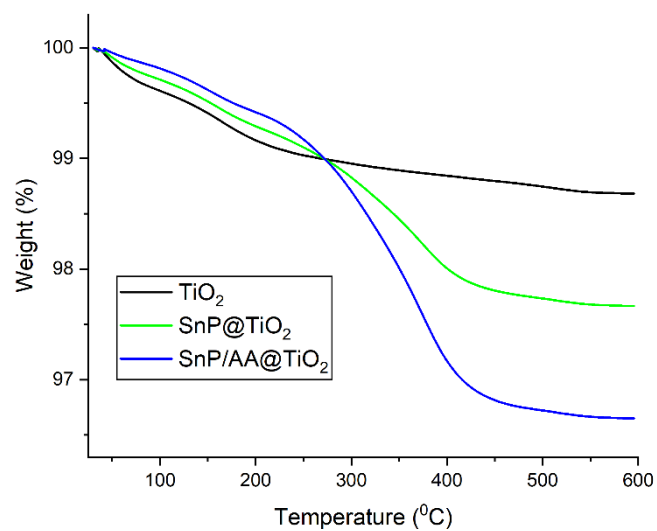

**Figure S2.** TGA curves of  $\text{TiO}_2$ ,  $\text{SnP@TiO}_2$ , and  $\text{SnP/AA@TiO}_2$ .

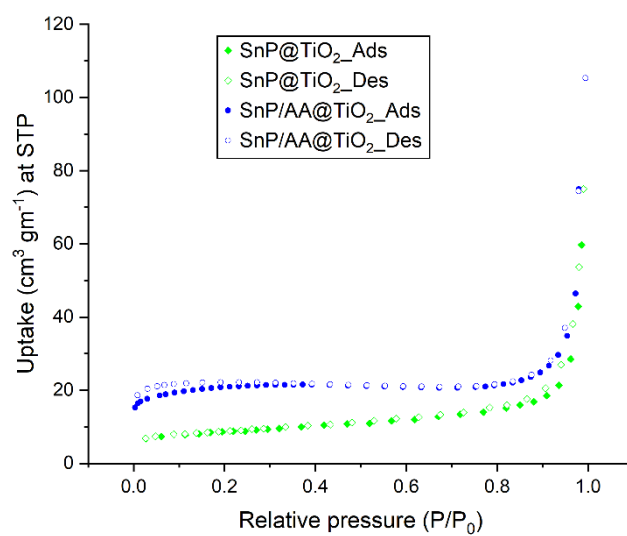

**Figure S3.**  $\text{N}_2$  adsorption-desorption isotherms of  $\text{SnP@TiO}_2$ , and  $\text{SnP/AA@TiO}_2$ .

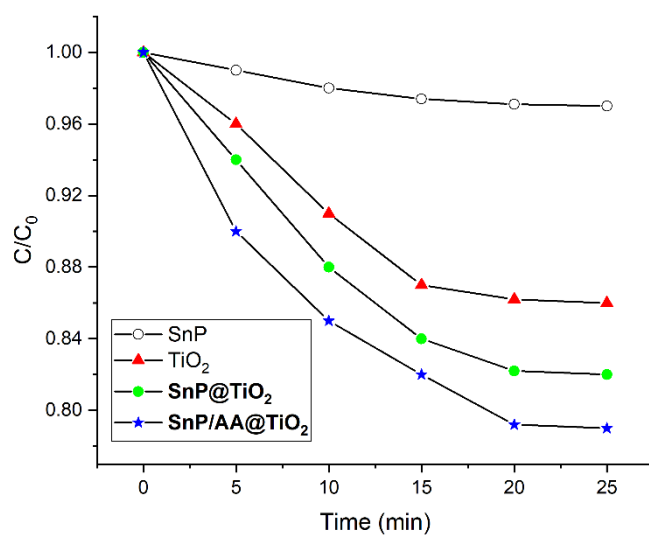

**Figure S4.** RhB adsorption ability of SnP, TiO<sub>2</sub>, SnP@TiO<sub>2</sub>, and SnP/AA@TiO<sub>2</sub>.

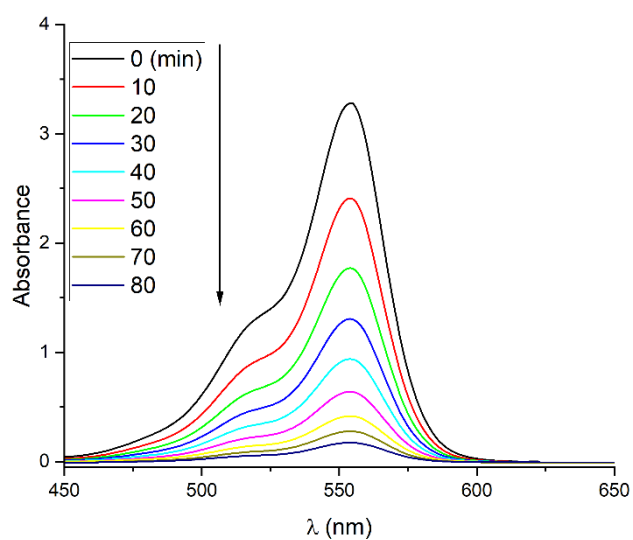

**Figure S5.** Photocatalytic degradation of RhB dye in aqueous solution by SnP/AA@TiO<sub>2</sub> under visible-light irradiation.

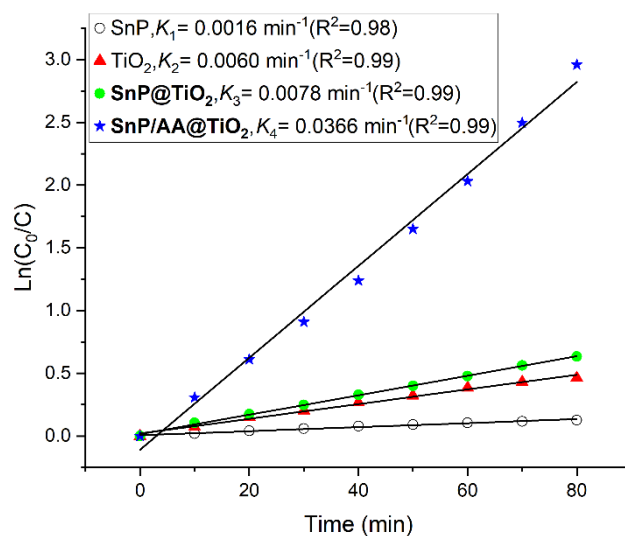

**Figure S6.** Kinetics for the photocatalytic degradation of RhB dye by SnP, TiO<sub>2</sub>, SnP@TiO<sub>2</sub>, and SnP/AA@TiO<sub>2</sub> photocatalysts under visible-light irradiation.

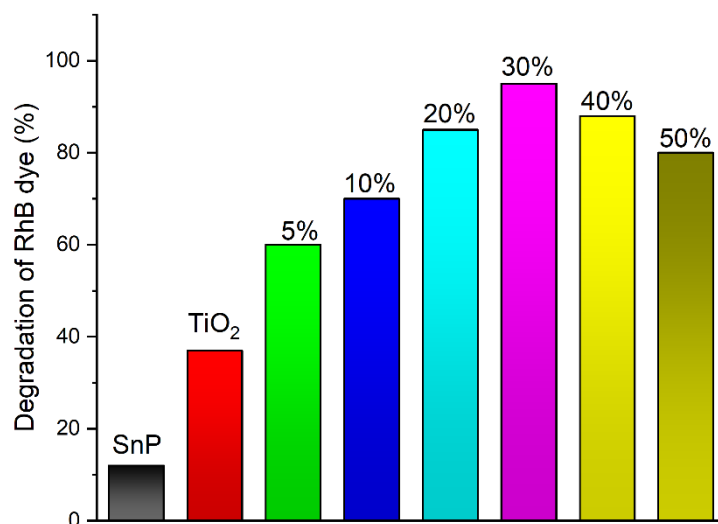

**Figure S7.** Comparison of RhB dye degradation in presence of SnP, TiO<sub>2</sub>, and SnP/AA@TiO<sub>2</sub> with various wt% of SnP with respect to TiO<sub>2</sub>.

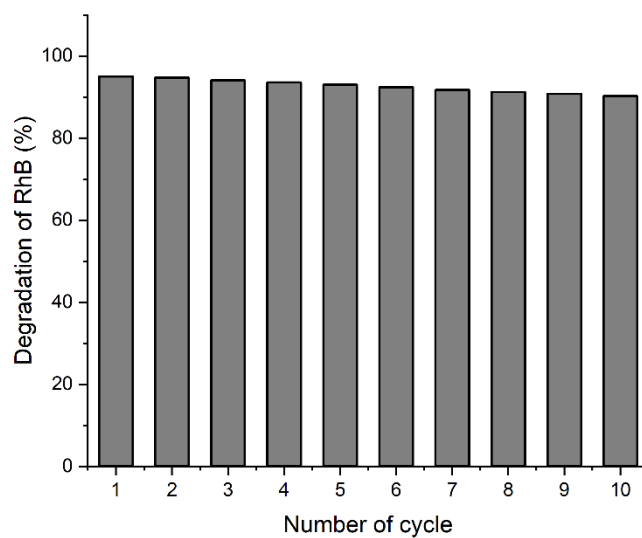

**Figure S8.** Recyclability of SnP/AA@TiO<sub>2</sub> composite photocatalyst in RhB degradation.

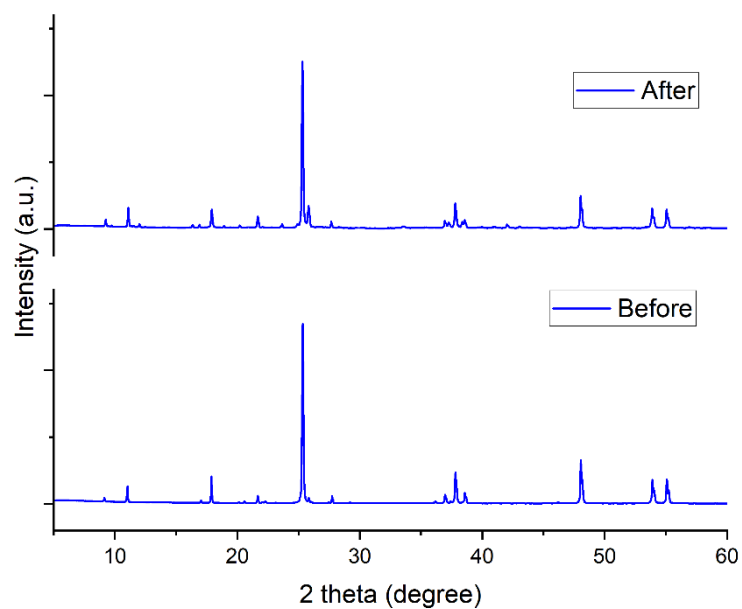

**Figure S9.** XRD of SnP/AA@TiO<sub>2</sub> composite photocatalyst before and after RhB degradation.

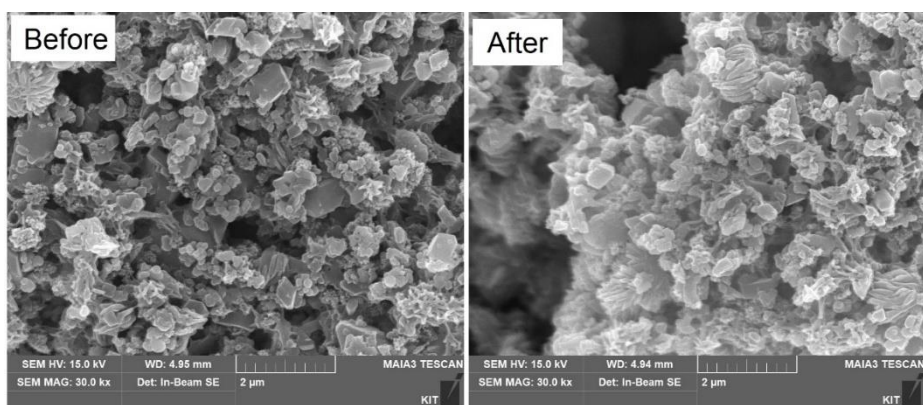

**Figure S10.** FE-SEM images of SnP/AA@TiO<sub>2</sub> composite photocatalyst before and after RhB degradation.

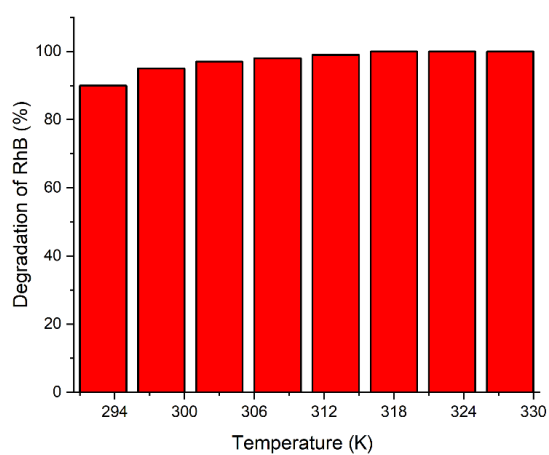

**Figure S11.** Effect of temperature on RhB degradation in the presence of SnP/AA@TiO<sub>2</sub> composite photocatalyst.

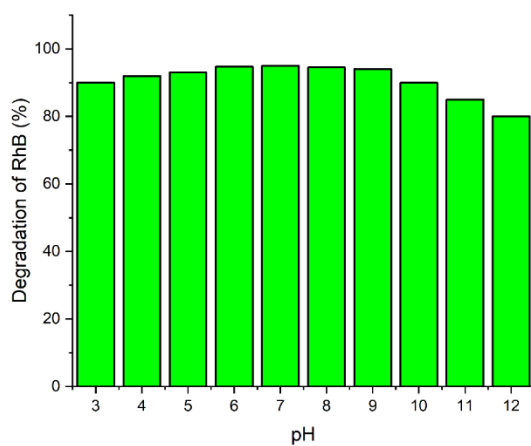

**Figure S12.** Effect of pH of the solution on RhB degradation in the presence of SnP/AA@TiO<sub>2</sub> composite photocatalyst.

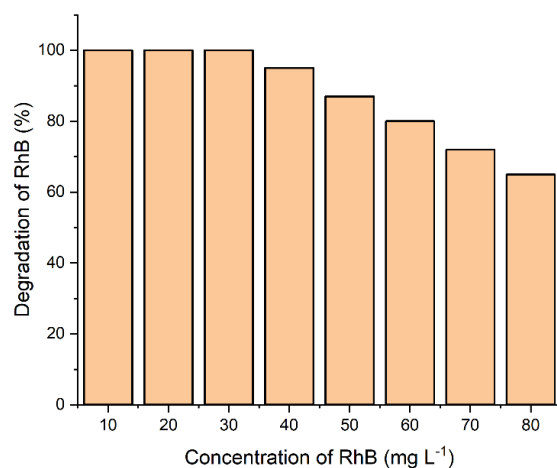

**Figure S13.** Effect of initial concentration of RhB on dye degradation using 50 mg of SnP/AA@TiO<sub>2</sub> composite photocatalyst.

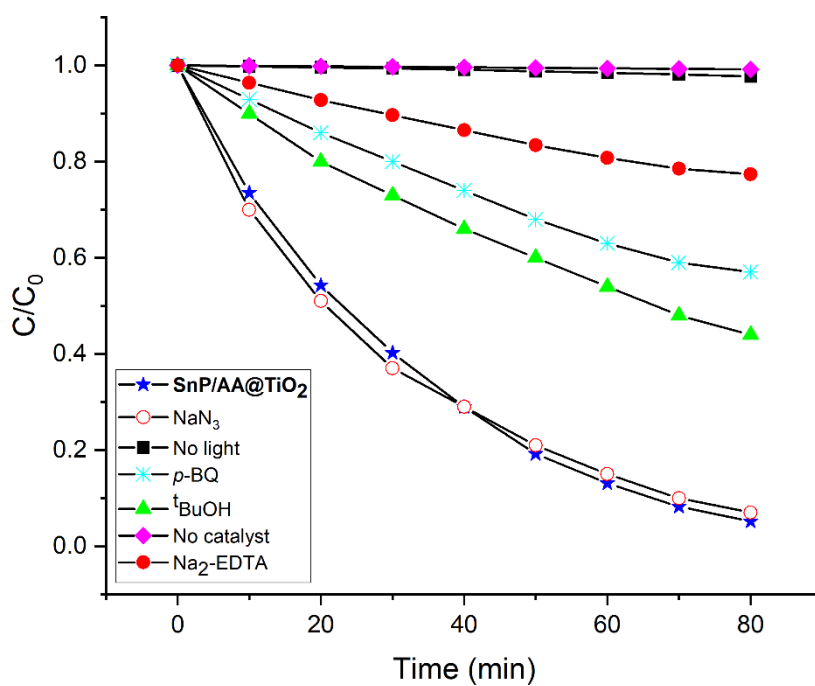

**Figure S14.** Photocatalytic degradation of RhB dye in aqueous solution by SnP/AA@TiO<sub>2</sub> composite photocatalyst with the addition of different scavengers under visible-light irradiation ([Na<sub>2</sub>-EDTA]<sub>0</sub> = [*p*-BQ]<sub>0</sub> = [<sup>t</sup>BuOH]<sub>0</sub> = 5 mM, pH 7.0, *T* = 298 K).

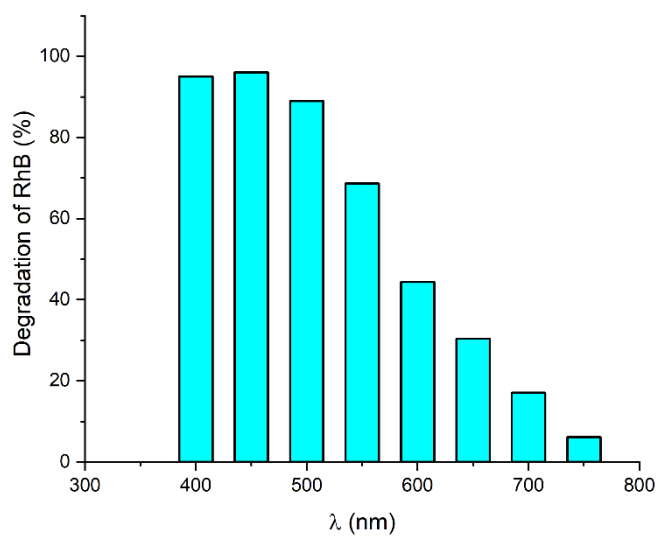

**Figure S15.** Photocatalytic activity of SnP/AA@TiO<sub>2</sub> at different wavelengths for the degradation of RhB dye.

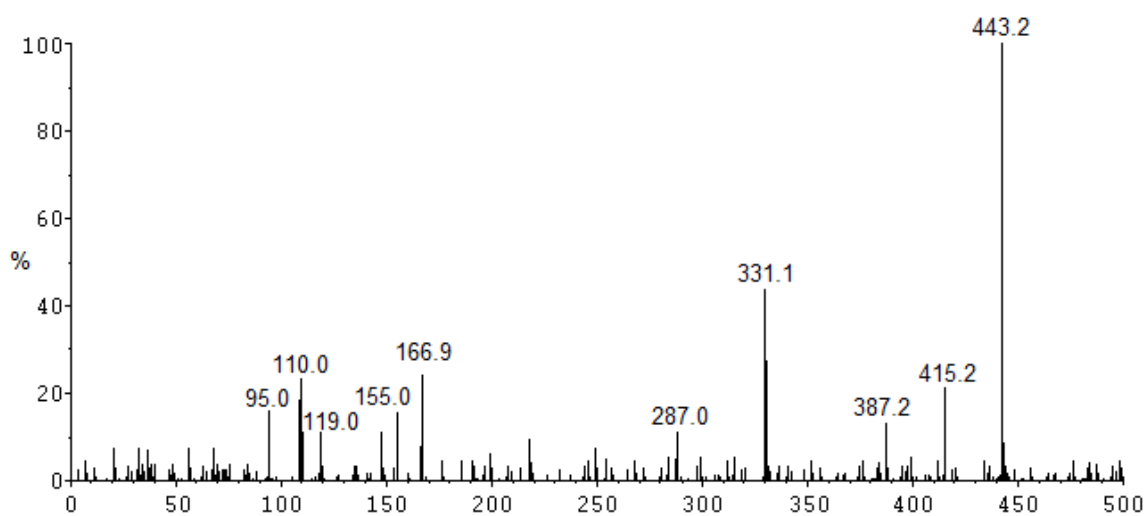

**Figure S16.** ESI-MS spectrum (positive ion mode) of the reaction mixture of RhB dye with the SnP/AA@TiO<sub>2</sub> composite photocatalyst after 40 min of visible-light irradiation.
